# Supplementary material for: The effect of medication use on chronic pruritus in patients with type 2 diabetes mellitus: A multicenter cross-sectional study
Source: Research Square preprint supplement (doi:10.21203/rs.3.rs-8376302/v1), 2026-01-19
Supplement: Supplementary file 1 [file 27324875d682929fa628ab09.docx]

**Supplemental Table 1.** Various classes of antidiabetic medications based on the Chi-squared test for the presence or absence of pruritus

| **Variable** | **Pruritus status** | | **P value** |
| --- | --- | --- | --- |
| **No Pruritus** | **Pruritus** |
| Biguanides,N (%) | 659 (55.4%) | 451 (53.3%) | 0.485 |
| AGIs,N (%) | 623 (51.6%) | 493 (57.9%) | 0.004** |
| Glinides,N (%) | 103 (8.5%) | 89 (10.5%) | 0.138 |
| SUs,N (%) | 154 (12.8%) | 128 (14.9%) | 0.203 |
| DPP-4is,N (%) | 189 (15.6%) | 170 (20.0%) | 0.011* |
| SGLT-2i,N (%) | 231 (19.1%) | 181 (21.3%) | 0.061 |
| TZDs,N (%) | 32 (2.6%) | 16 (1.9%) | 0.351 |
| GKAs,N (%) | 3 (0.2%) | 1 (0.1%) | 0.879 |
| Injectable Insulins,N (%) | 260 (21.5%) | 218 (25.6%) | 0.031* |
| GLP-1RAs,N (%) | 39 (3.3%) | 31 (3.9%) | 0.609 |

*P < 0.05，**P < 0.01，***P < 0.001

**Supplemental Table 2.** Various classes of antihyperlipidemic medications based on the Chi-squared test for the presence or absence of pruritus

| **Variable** | **Pruritus status** | | **P value** |
| --- | --- | --- | --- |
| **No Pruritus** | **Pruritus** |
| Fibrates,N (%) | 18 (1.5%) | 16 (1.9%) | 0.494 |
| Probucol,N (%) | 7 (0.6%) | 4 (0.5%) | 0.977 |
| Statins,N (%) | 473 (39.2%) | 393 (46.2%) | 0.001** |
| Ezetimibe,N (%) | 11 (1.0%) | 11 (1.3%) | 0.406 |
| PCSK9is,N (%) | 4 (0.3%) | 4 (0.5%) | 0.889 |
| Chinese Herbal Medicinea,N (%) | 39 (3.2%) | 27 (3.2%) | 0.706 |

aXuezhikang、Zhibitai

*P < 0.05，**P < 0.01，***P < 0.001

**Supplemental Table 3.** Interaction effects of DPP-4is, AGIs, and statins on the risk of pruritus

| **Variable** | **Pruritus OR (95%)** | **P for interaction** |
| --- | --- | --- |
|  |
| DPP-4is × AGIs | 0.85 (0.44–1.65) | 0.789 |  |
| DPP-4is × Statins | 0.85 (0.44–1.65) | 0.636 |  |
| AGIs × Statins | 1.3 (0.86–1.96) | 0.217 |  |
| AGIs × Statins × DPP-4is | 0.93 (0.36–2.43) | 0.885 |  |
